# Supplementary material for: MET inhibition overcomes radiation resistance of glioblastoma stem‐like cells
Source: PubMed Central journal article supplement (PMC5130292; doi:10.15252/emmm.201505890), 2016-04-04
Supplement: EMMM-8-550-s002.pdf [file EMMM-8-550-s002.pdf]

## Expanded View Figures

**Figure EV1. GSCs are radioresistant regardless of genetic and phenotypic features.**

- A Cell viability of NS and astrocyte cell lines measured at the indicated time points after irradiation (2 Gy) (fold versus non-irradiated cells, ctrl). Data are represented as mean  $\pm$  SEM. \*: one-way ANOVA,  $P < 0.05$ .  $n = 2$ .
- B, C Box plots representing NS viability measured 72 h after irradiation (2–10 Gy) with respect to the most frequent GBM genetic alterations (B) or transcriptional profiles (C). Data are represented as percentage of viable cells versus non-irradiated cells (wt: wild-type; amp: gene copy number difference between EGFR and HGF > 5; loss: PTEN biallelic inactivation by deletion and/or mutation; mut: mutated TP53; del: NFKBIA gene copy number < 1.5; CL: classical subtype; MES: mesenchymal subtype; PN: proneural subtype). No statistically significant difference (one-way ANOVA) has been found among genetically or phenotypically different groups. Data information for box plots: median (line), upper/lower quartile (box), min/max (error bars).

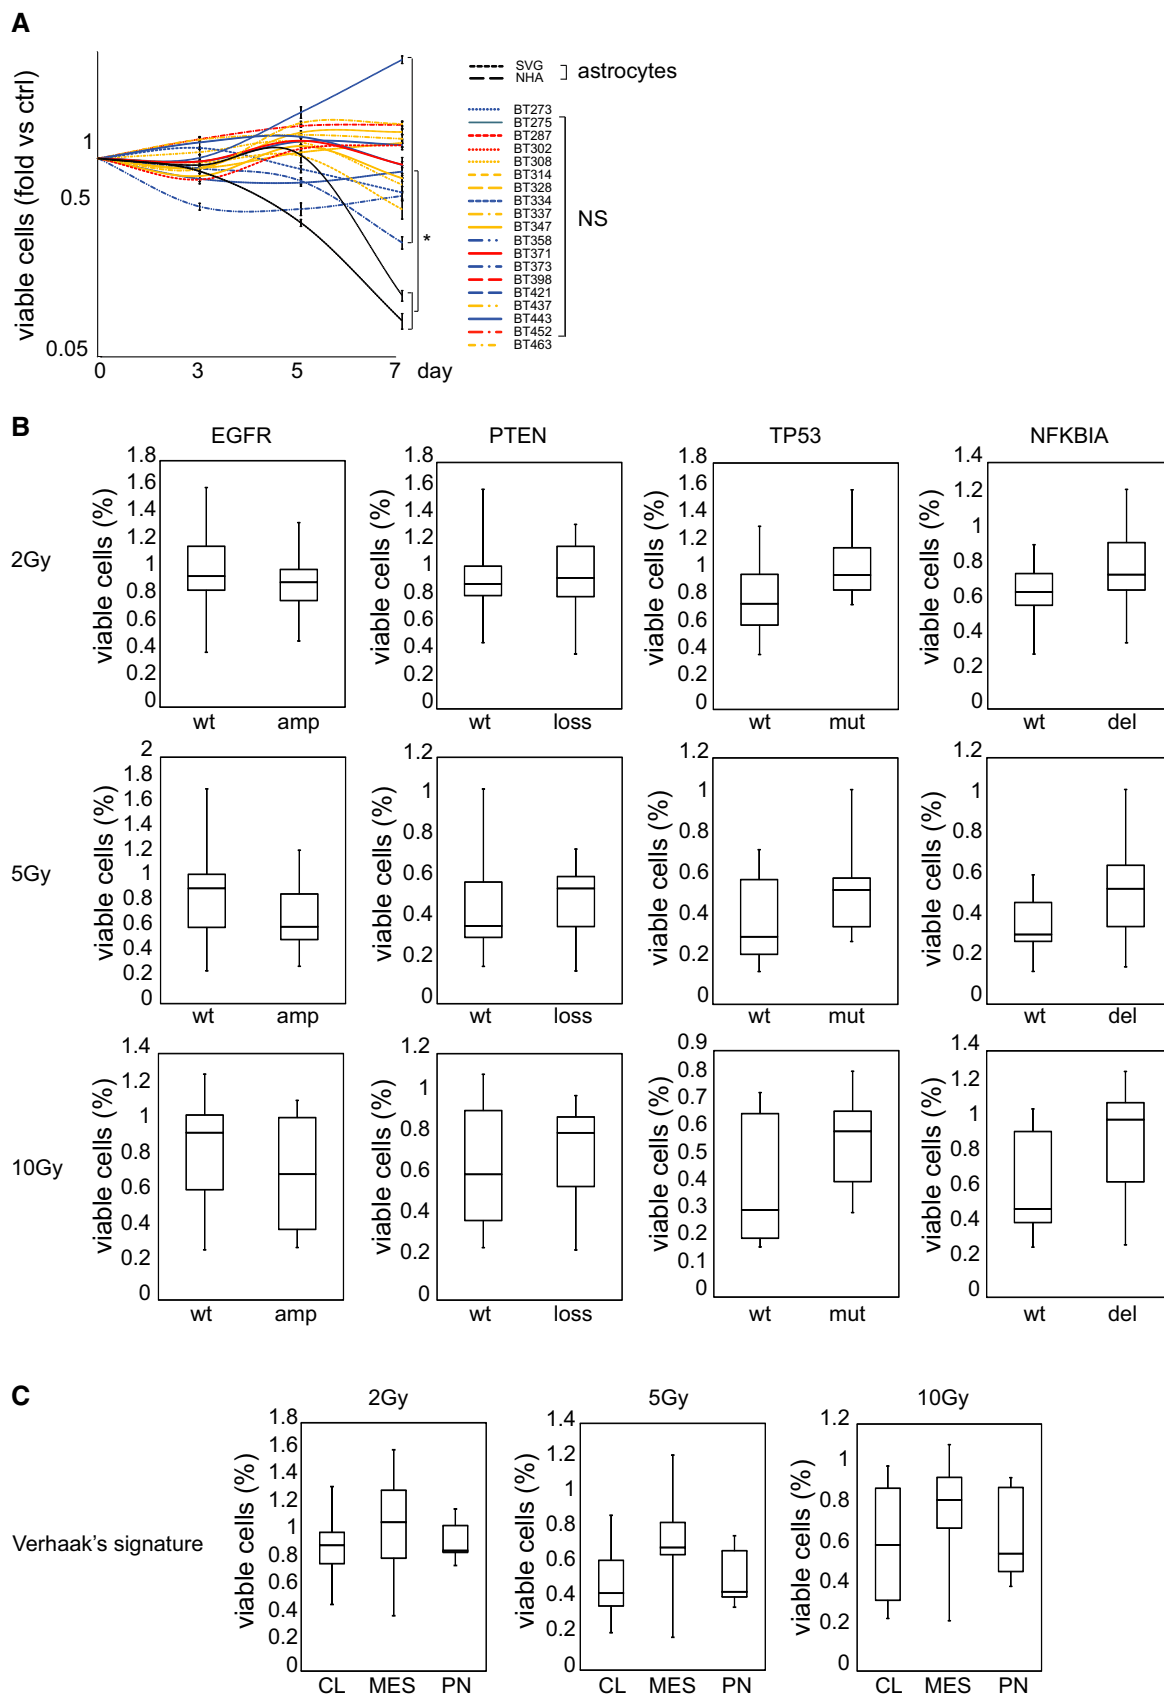

Figure EV1.

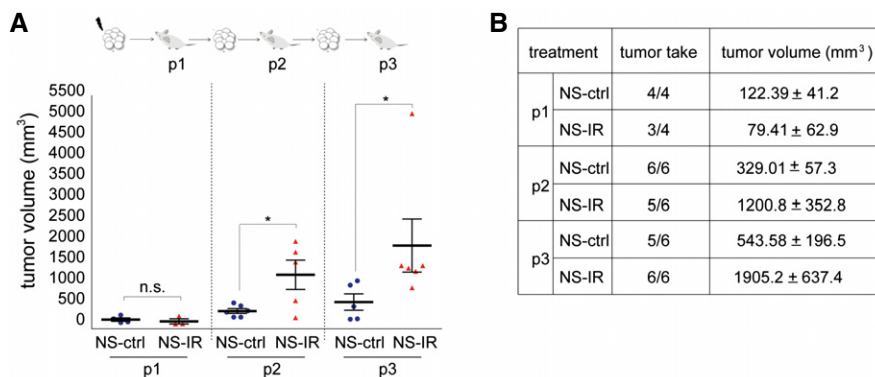

**Figure EV2. Increased tumorigenesis in serial passages of irradiated NS.**

A Top: schematic representation of serial xenotransplantation. Bottom: scatter plot showing take and volume (14 weeks after cell injection) of tumors generated by control (NS-ctrl) and irradiated (NS-IR) NS for each transplantation passage ( $10^3$  cells). \*: t-test,  $P < 0.05$ ; n.s. not significant.  $n = 4$  for p1;  $n = 6$  for p2 and p3.

B Table showing data represented in (A).

Data information: Data are mean ± SEM.

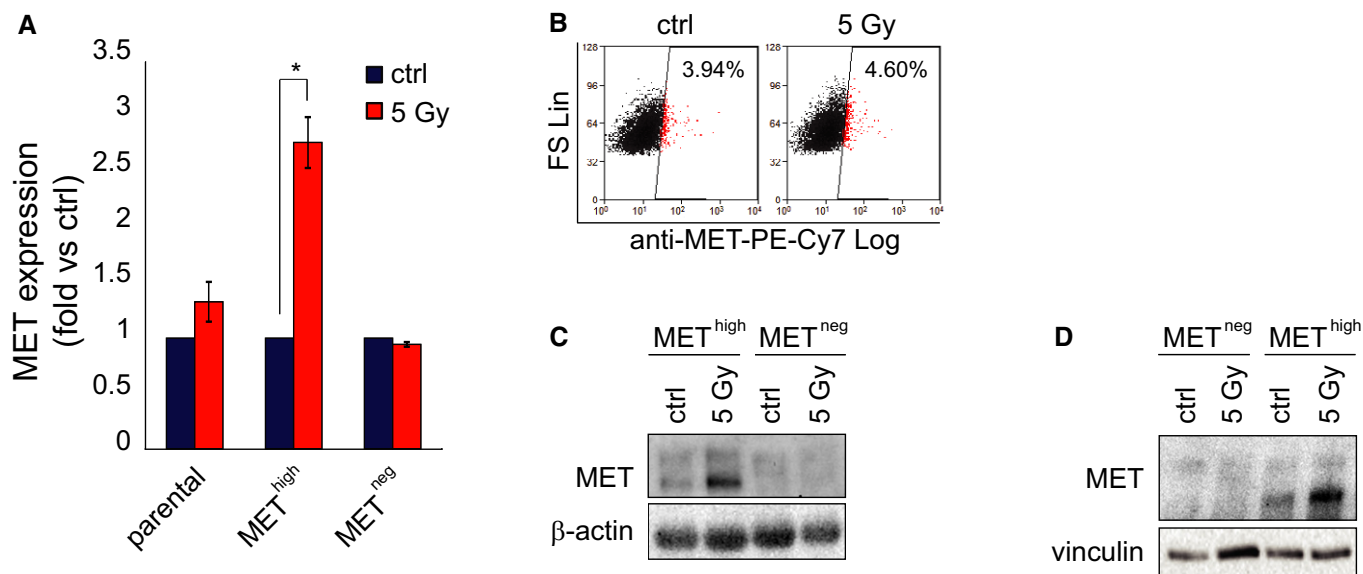

**Figure EV3. MET is upregulated in sorted MET<sup>high</sup> but not MET<sup>neg</sup> NS subpopulations.**

A qPCR of MET expression in parental BT308NS and sorted MET<sup>high</sup> and MET<sup>neg</sup> subpopulation 24 h after IR (5 Gy, fold versus non-irradiated cells, ctrl). \*: t-test,  $P < 0.02$ .  $n = 3$ .

B Flow cytometric analysis of MET in the MET<sup>neg</sup> subpopulation sorted from BT308NS, 24 h after IR (5 Gy). The percentage of MET-expressing cells is indicated. Ctrl: non-irradiated cells.

C, D Western blot showing MET protein expression in MET<sup>high</sup> and MET<sup>neg</sup> subpopulations sorted from BT452NS (C) or BT308NS (D) 24 h after treatment (5 Gy). Vinculin and  $\beta$ -actin were used as loading controls. Ctrl: non-irradiated cells.

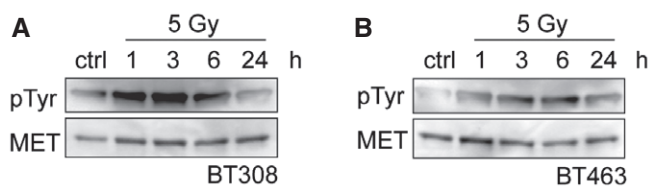

**Figure EV4. MET is hyperphosphorylated after NS irradiation.**

A, B Western blots of BT308NS (A) and BT463NS (B) showing MET tyrosine phosphorylation (pTyr) in NS kept in the presence of HGF (10 ng/ml), extracted at the indicated time points after irradiation (5 Gy), and immunoprecipitated with MET antibodies.
