# Supplementary material for: MET inhibition overcomes radiation resistance of glioblastoma stem‐like cells
Source: PubMed Central journal article supplement (PMC5130292; doi:10.15252/emmm.201505890), 2016-04-04

**Figure 4B**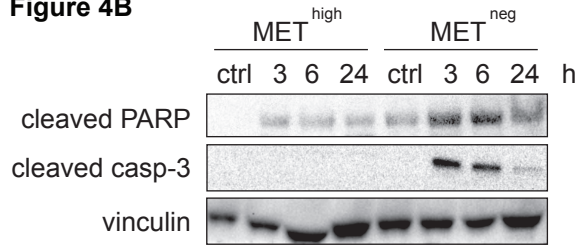**Original scans Figure 4B**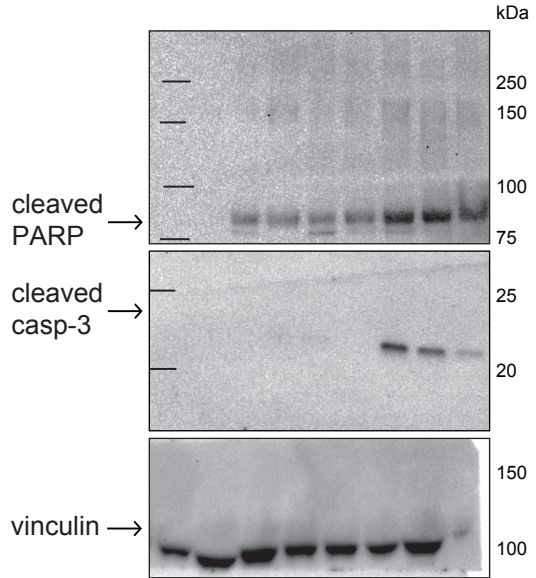**Figure 4F**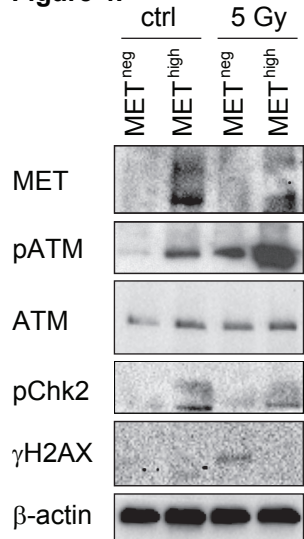**Original scans Figure 4F**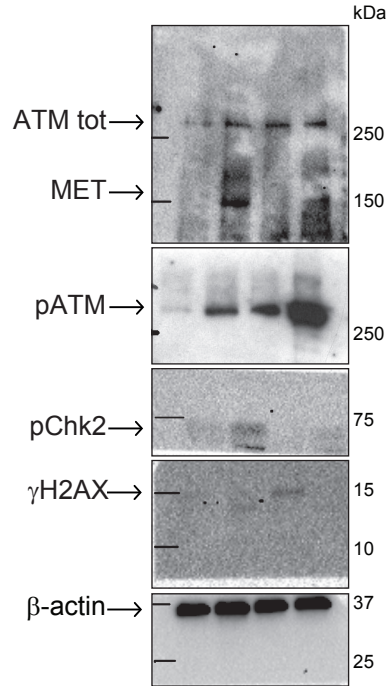

Supplement: EMMM-8-550-s003.pdf [file EMMM-8-550-s003.pdf]
