# Supplementary material for: MET inhibition overcomes radiation resistance of glioblastoma stem‐like cells
Source: PubMed Central journal article supplement (PMC5130292; doi:10.15252/emmm.201505890), 2016-04-04
Supplement: EMMM-8-550-s005.pdf [file EMMM-8-550-s005.pdf]

**Figure 6A**

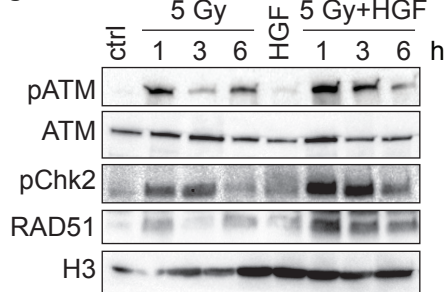

**Original scans Figure 6A**

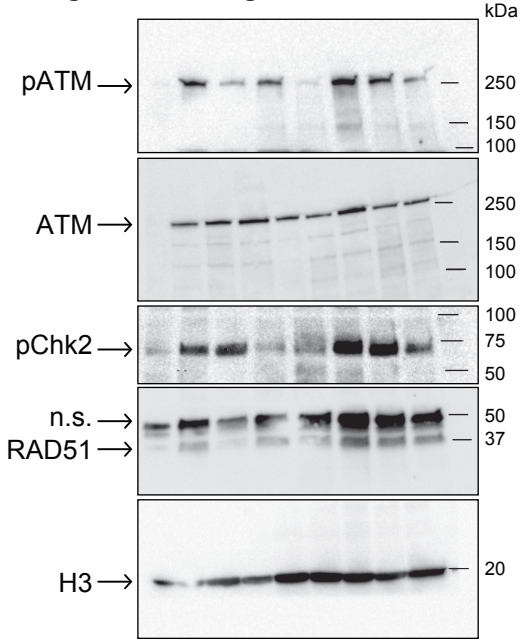

**Figure 6B**

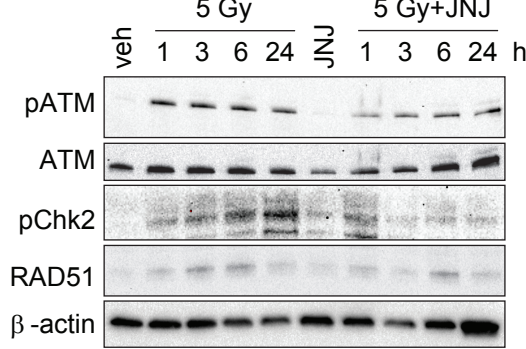

**Original scans Figure 6B**

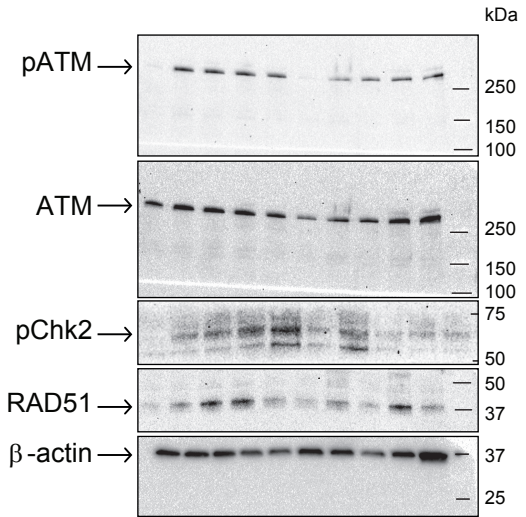

**Figure 6D**

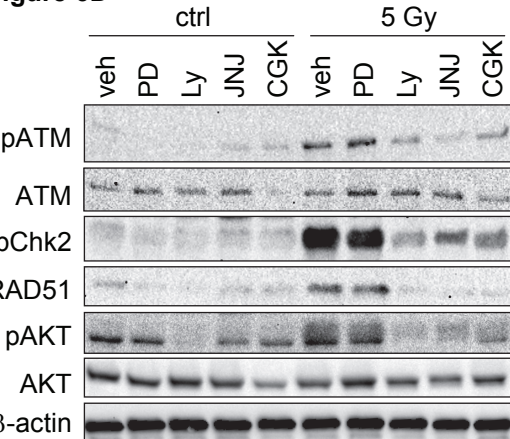

**Original scans Figure 6D**

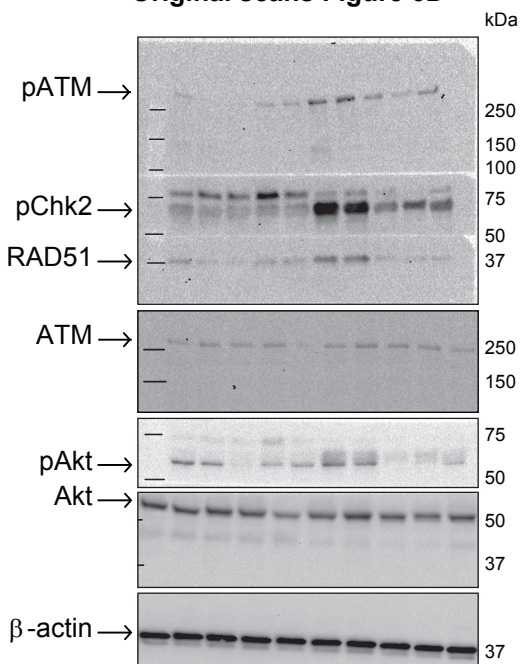

**Figure 6E**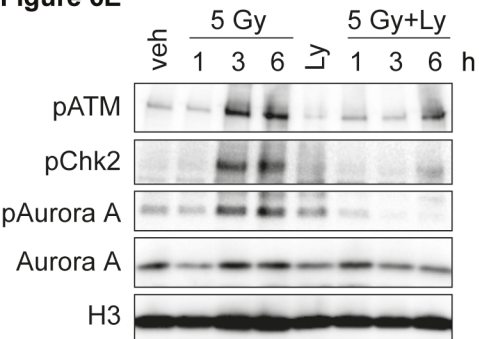**Original scans Figure 6E**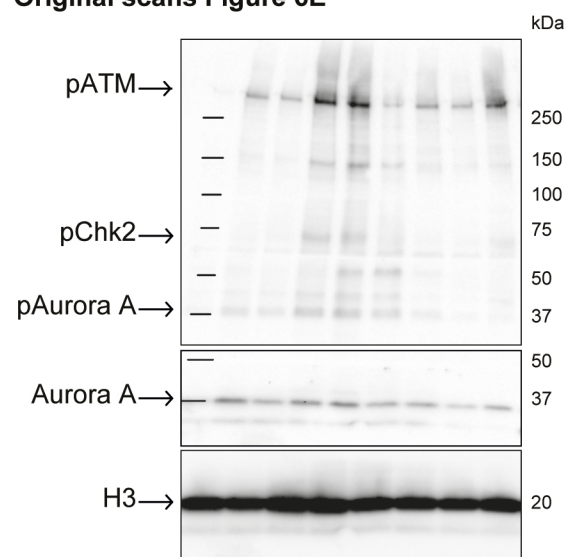**Figure 6F**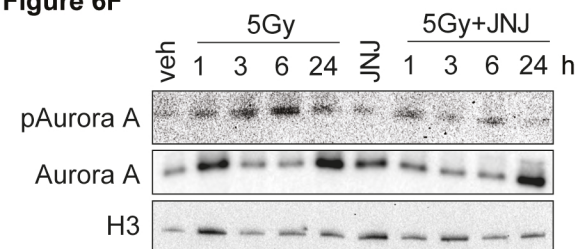**Original scans Figure 6F**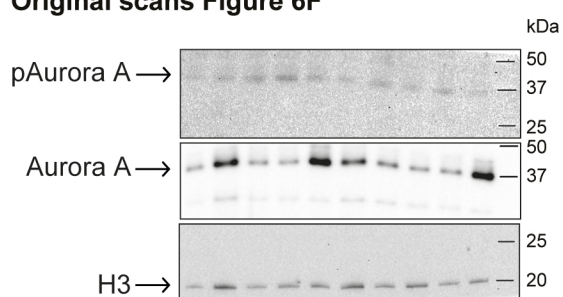**Figure 6G**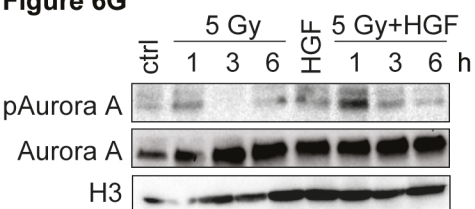**Original scans Figure 6G**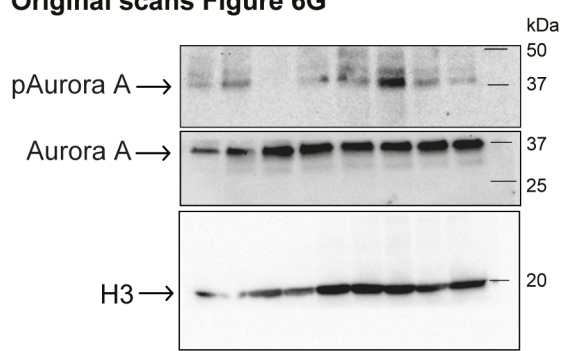

NB. the same H3 blot has been shown for Figure 6A and 6G as they are part of the same experiment
