# Supplementary material for: MET inhibition overcomes radiation resistance of glioblastoma stem‐like cells
Source: PubMed Central journal article supplement (PMC5130292; doi:10.15252/emmm.201505890), 2016-04-04
Supplement: EMMM-8-550-s006.pdf [file EMMM-8-550-s006.pdf]

**Figure 7C**

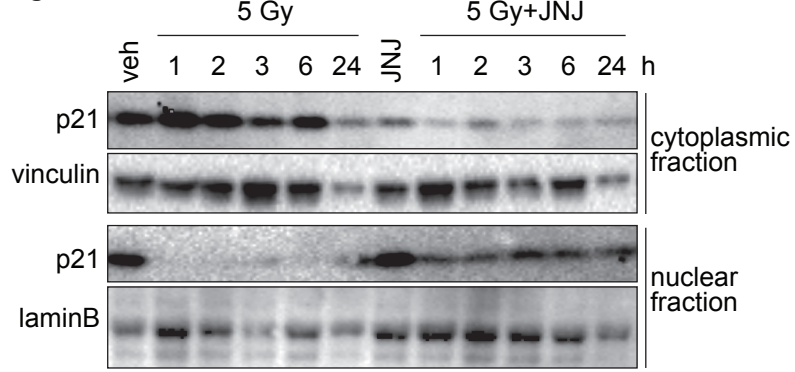

**Original scans Figure 7C**

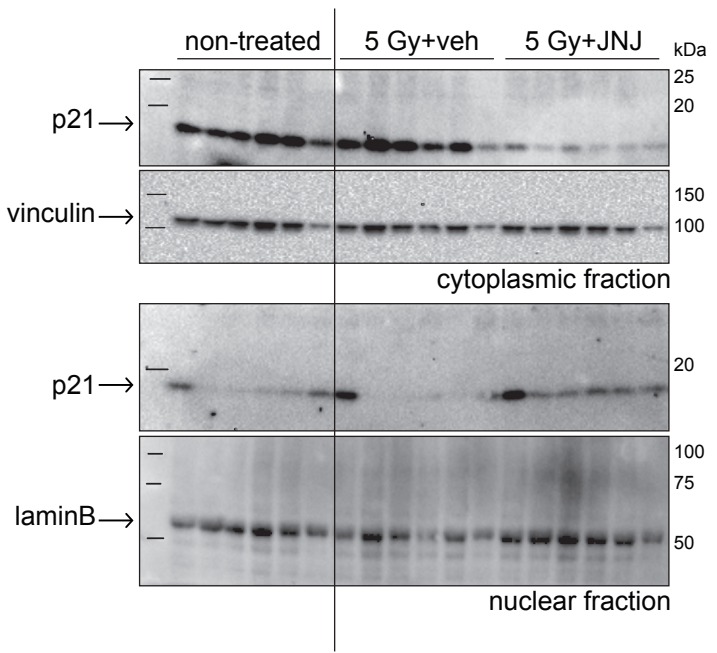

NB. lanes 1-6 are multiple control samples (irradiated cells without vehicle)
